# Supplementary material for: Oncogenic CARMA1 couples NF-κB and β-catenin signaling in diffuse large B-cell lymphomas
Source: PubMed Central journal article supplement (PMC4981874; doi:10.1038/onc.2015.493), 2016-01-18
Supplement: onc2015493x2.pdf [file onc2015493x2.pdf]

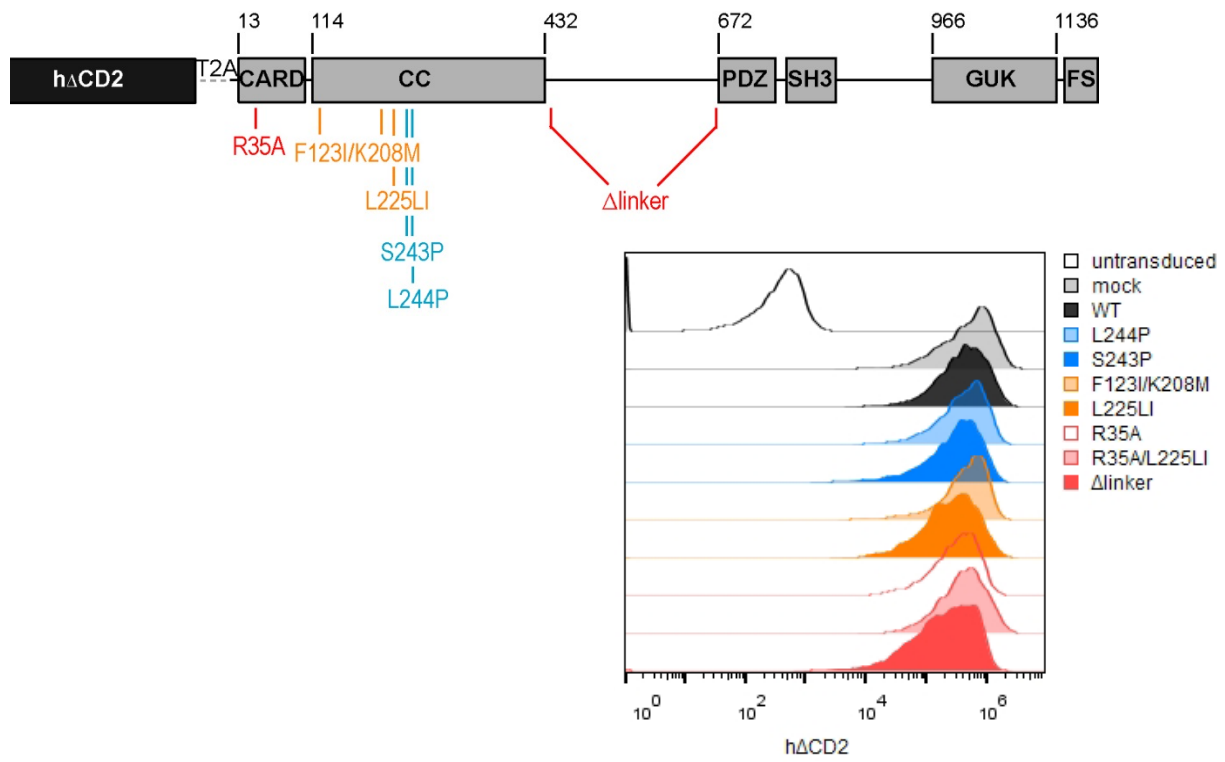

Fig. S1

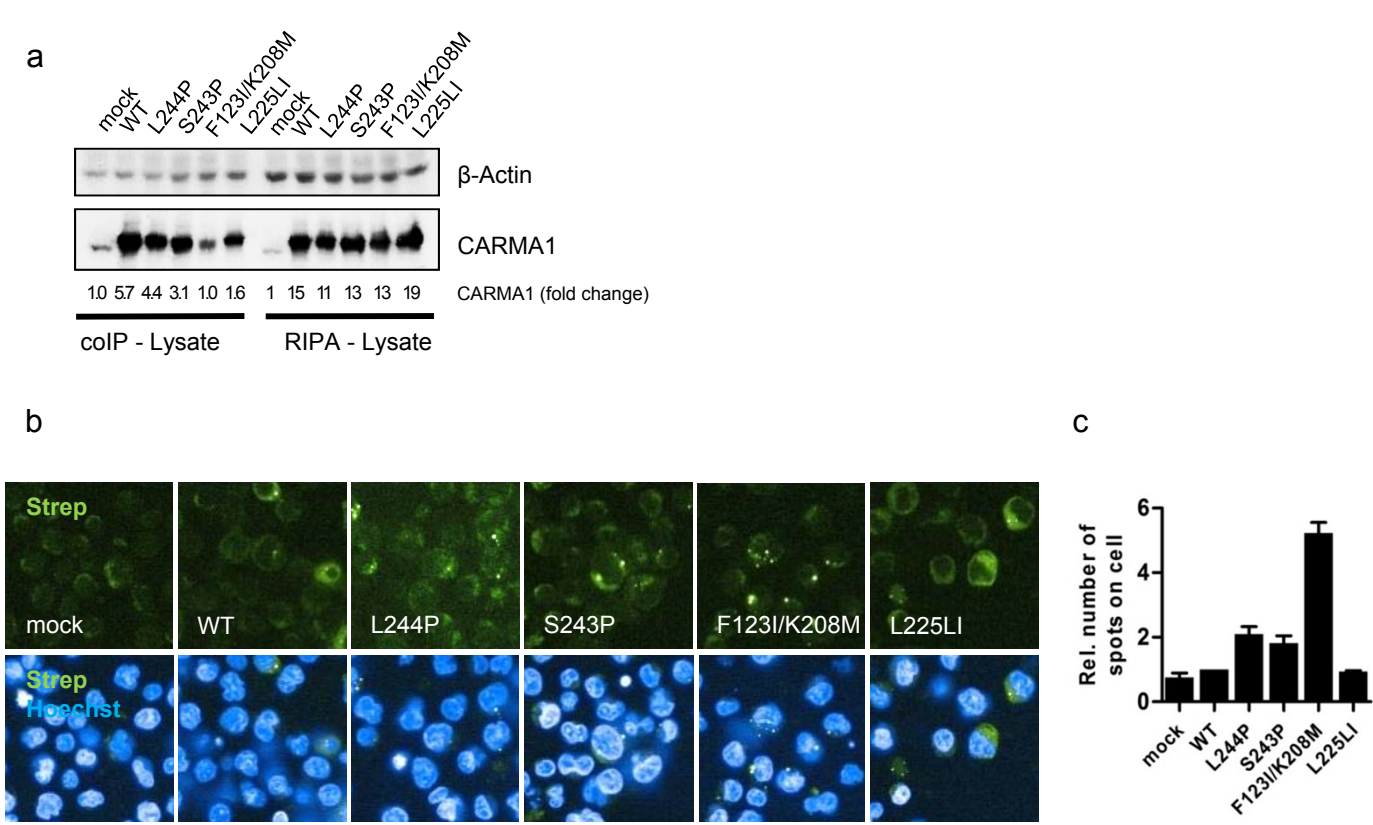

Fig. S2

a

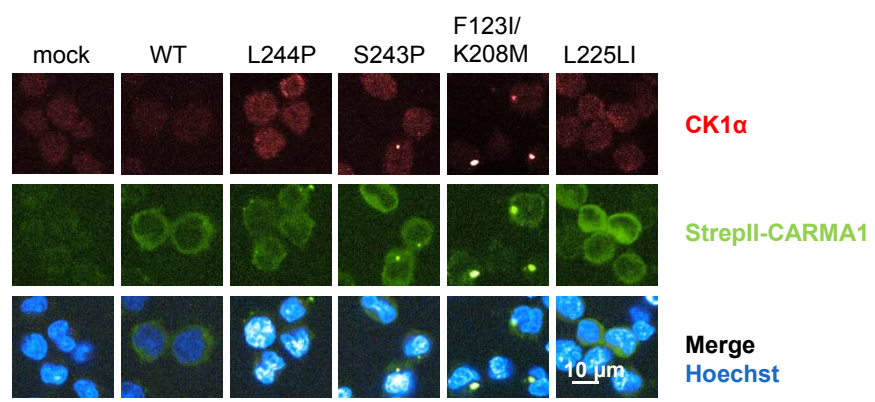

b

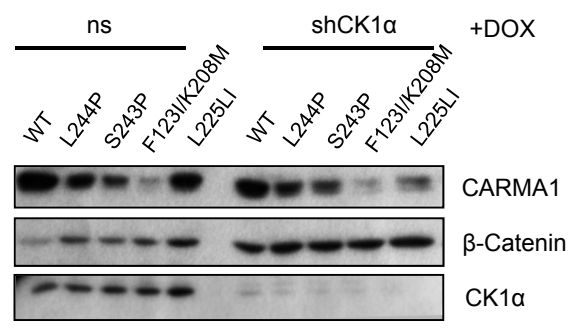

c

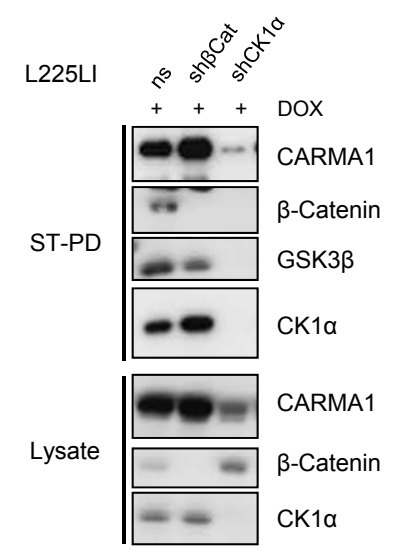

Fig. S3

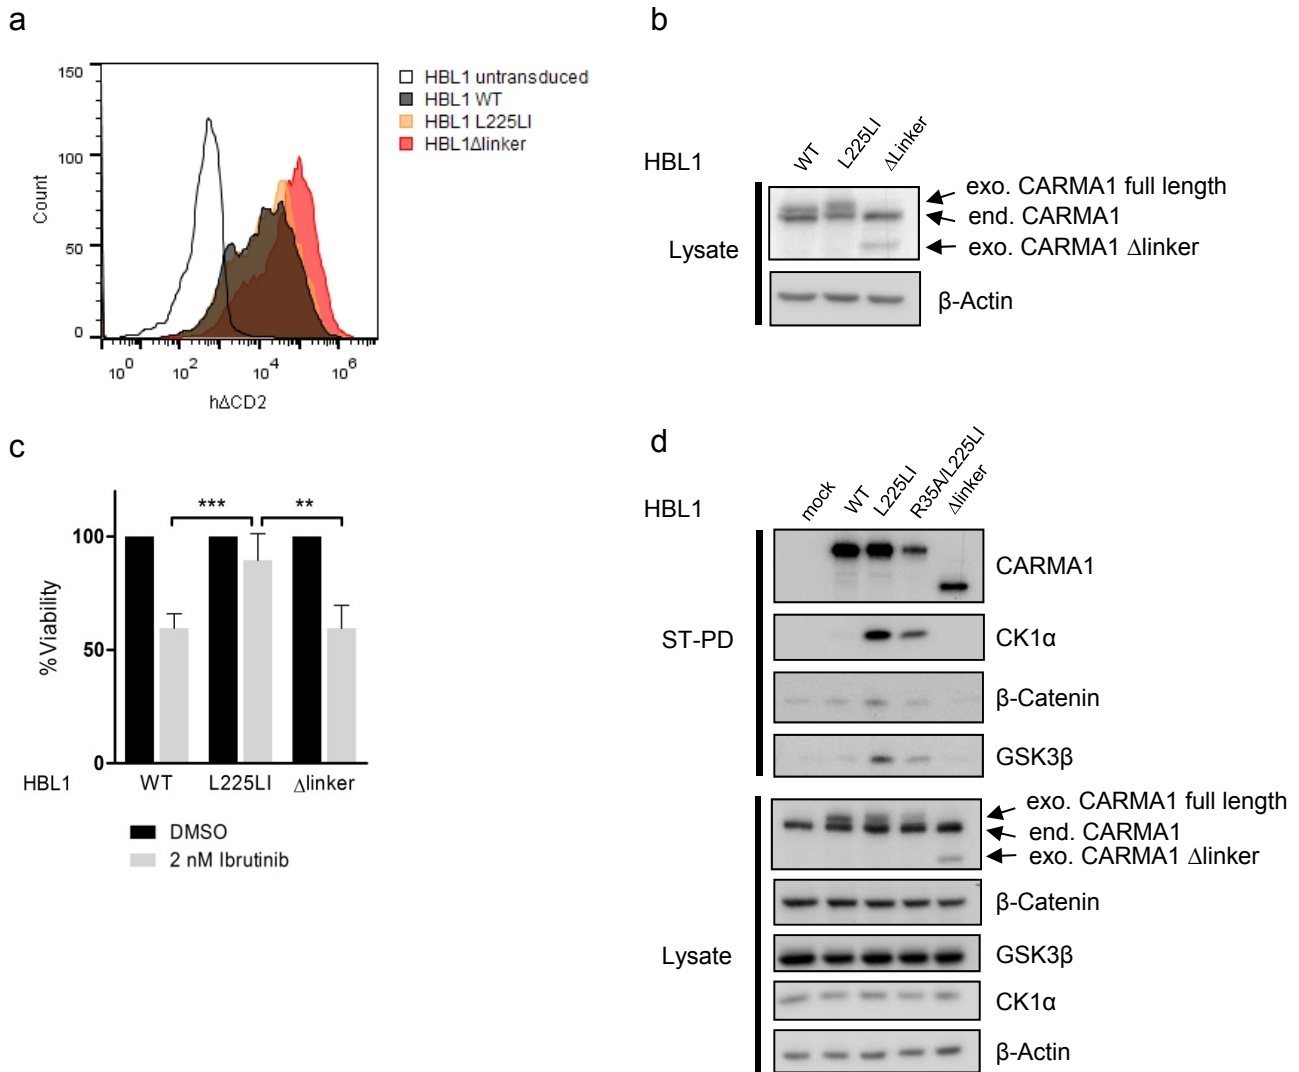

Fig. S4

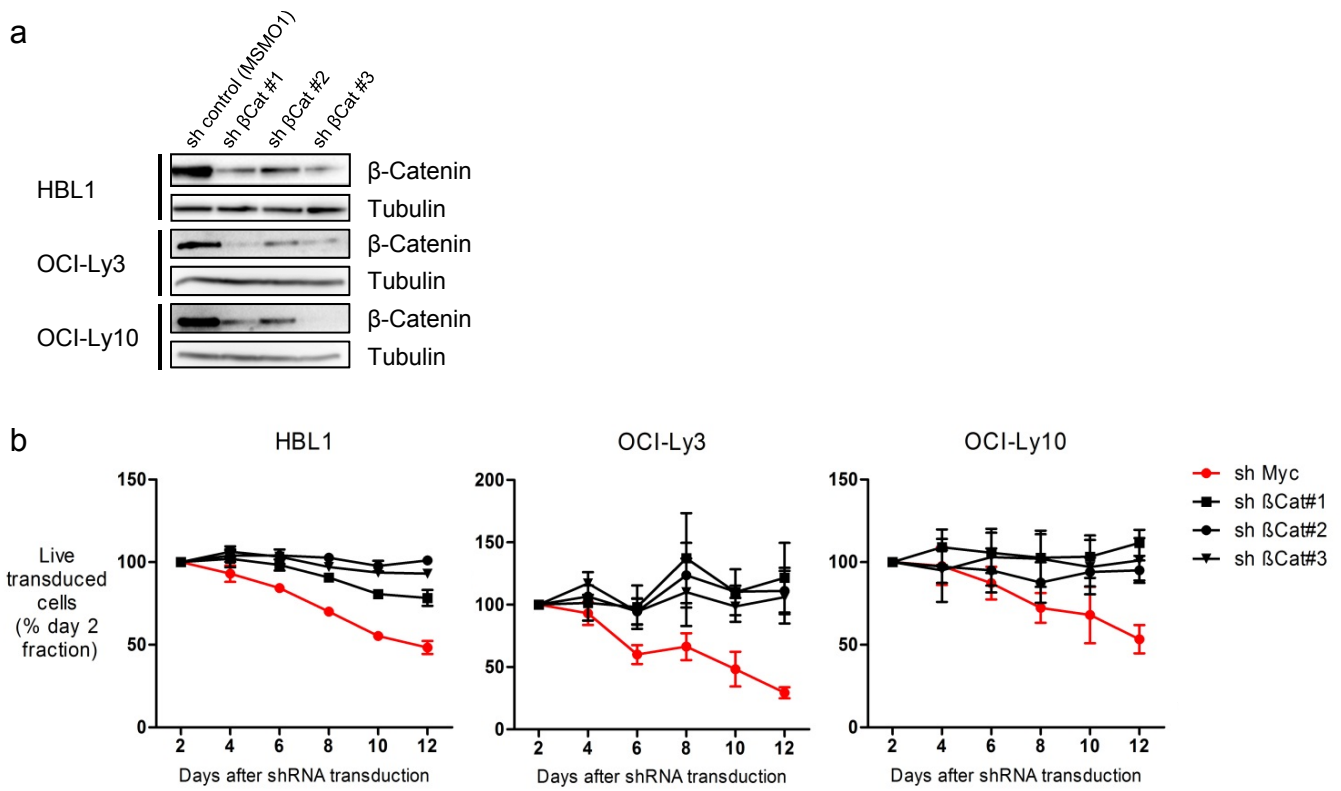

Fig. S5

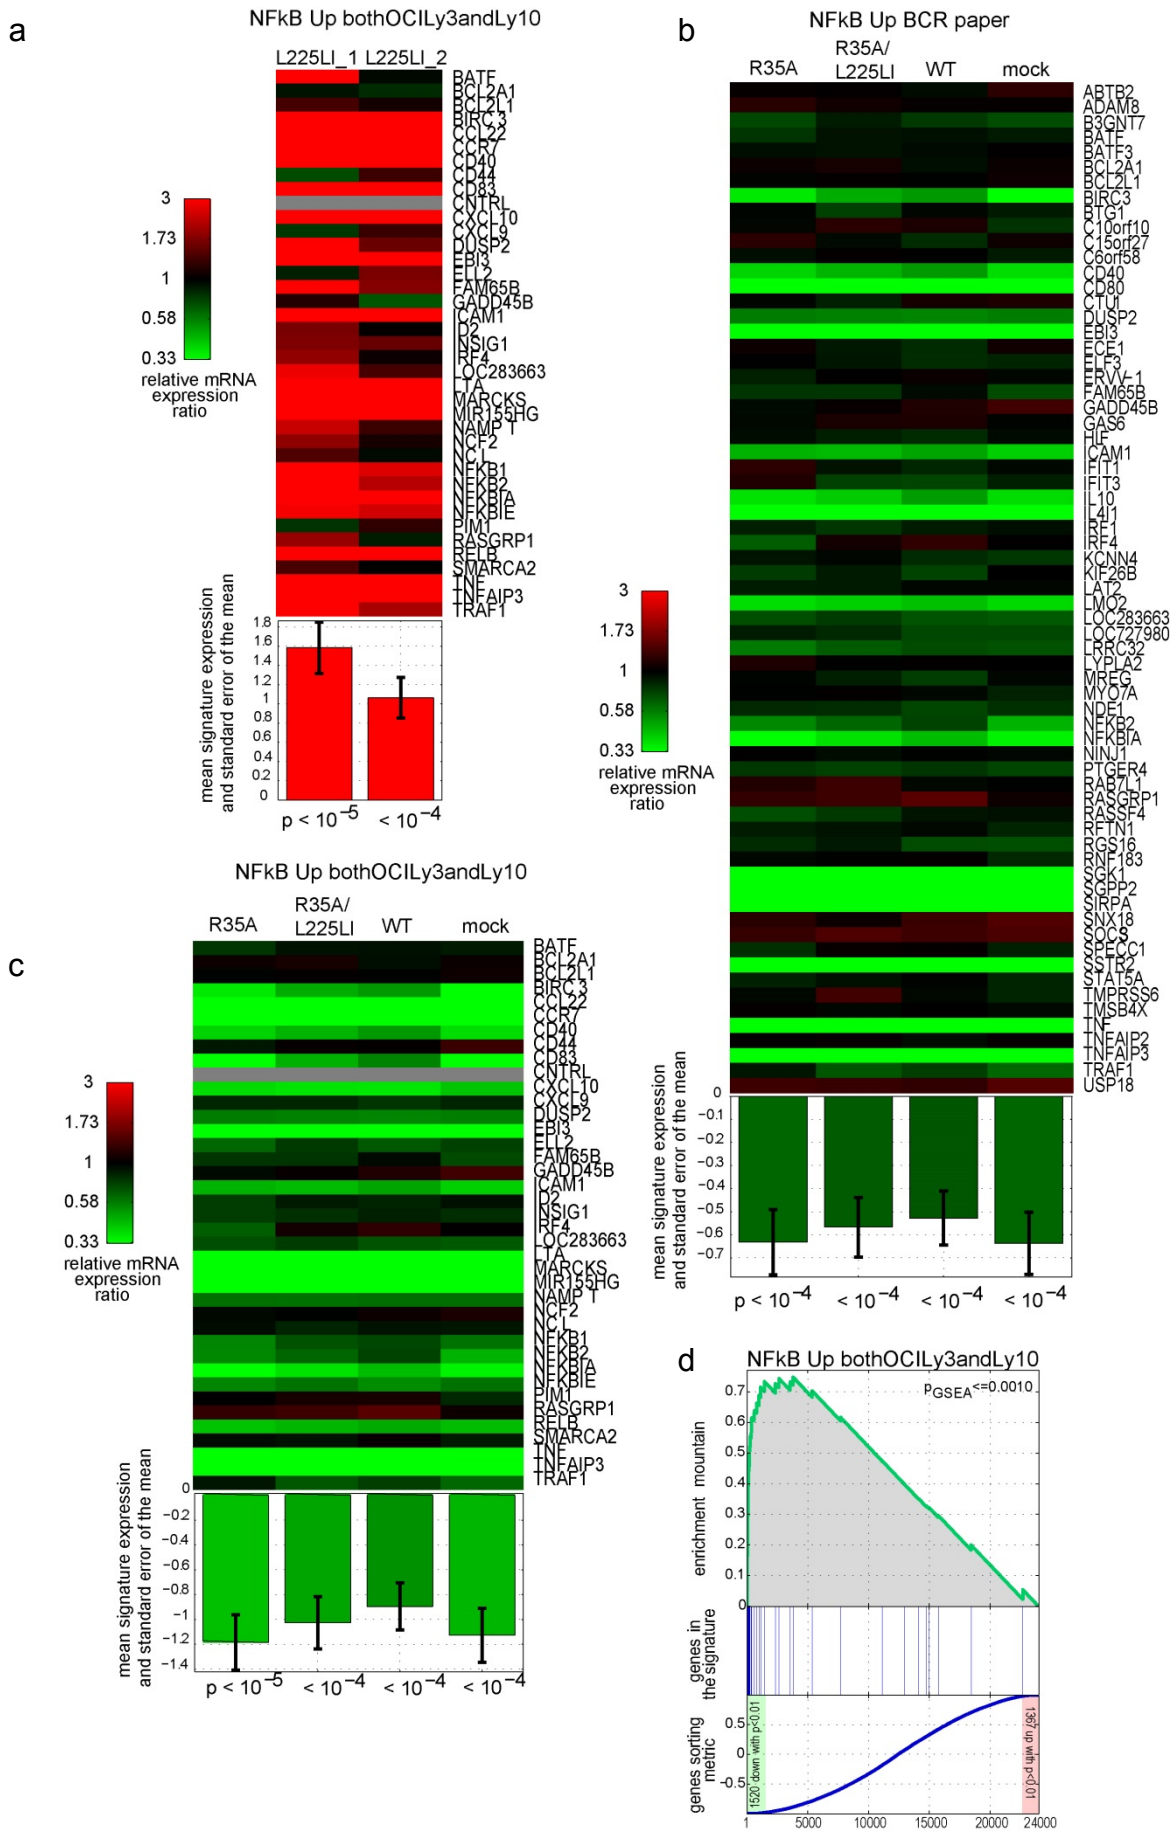

Fig. S6

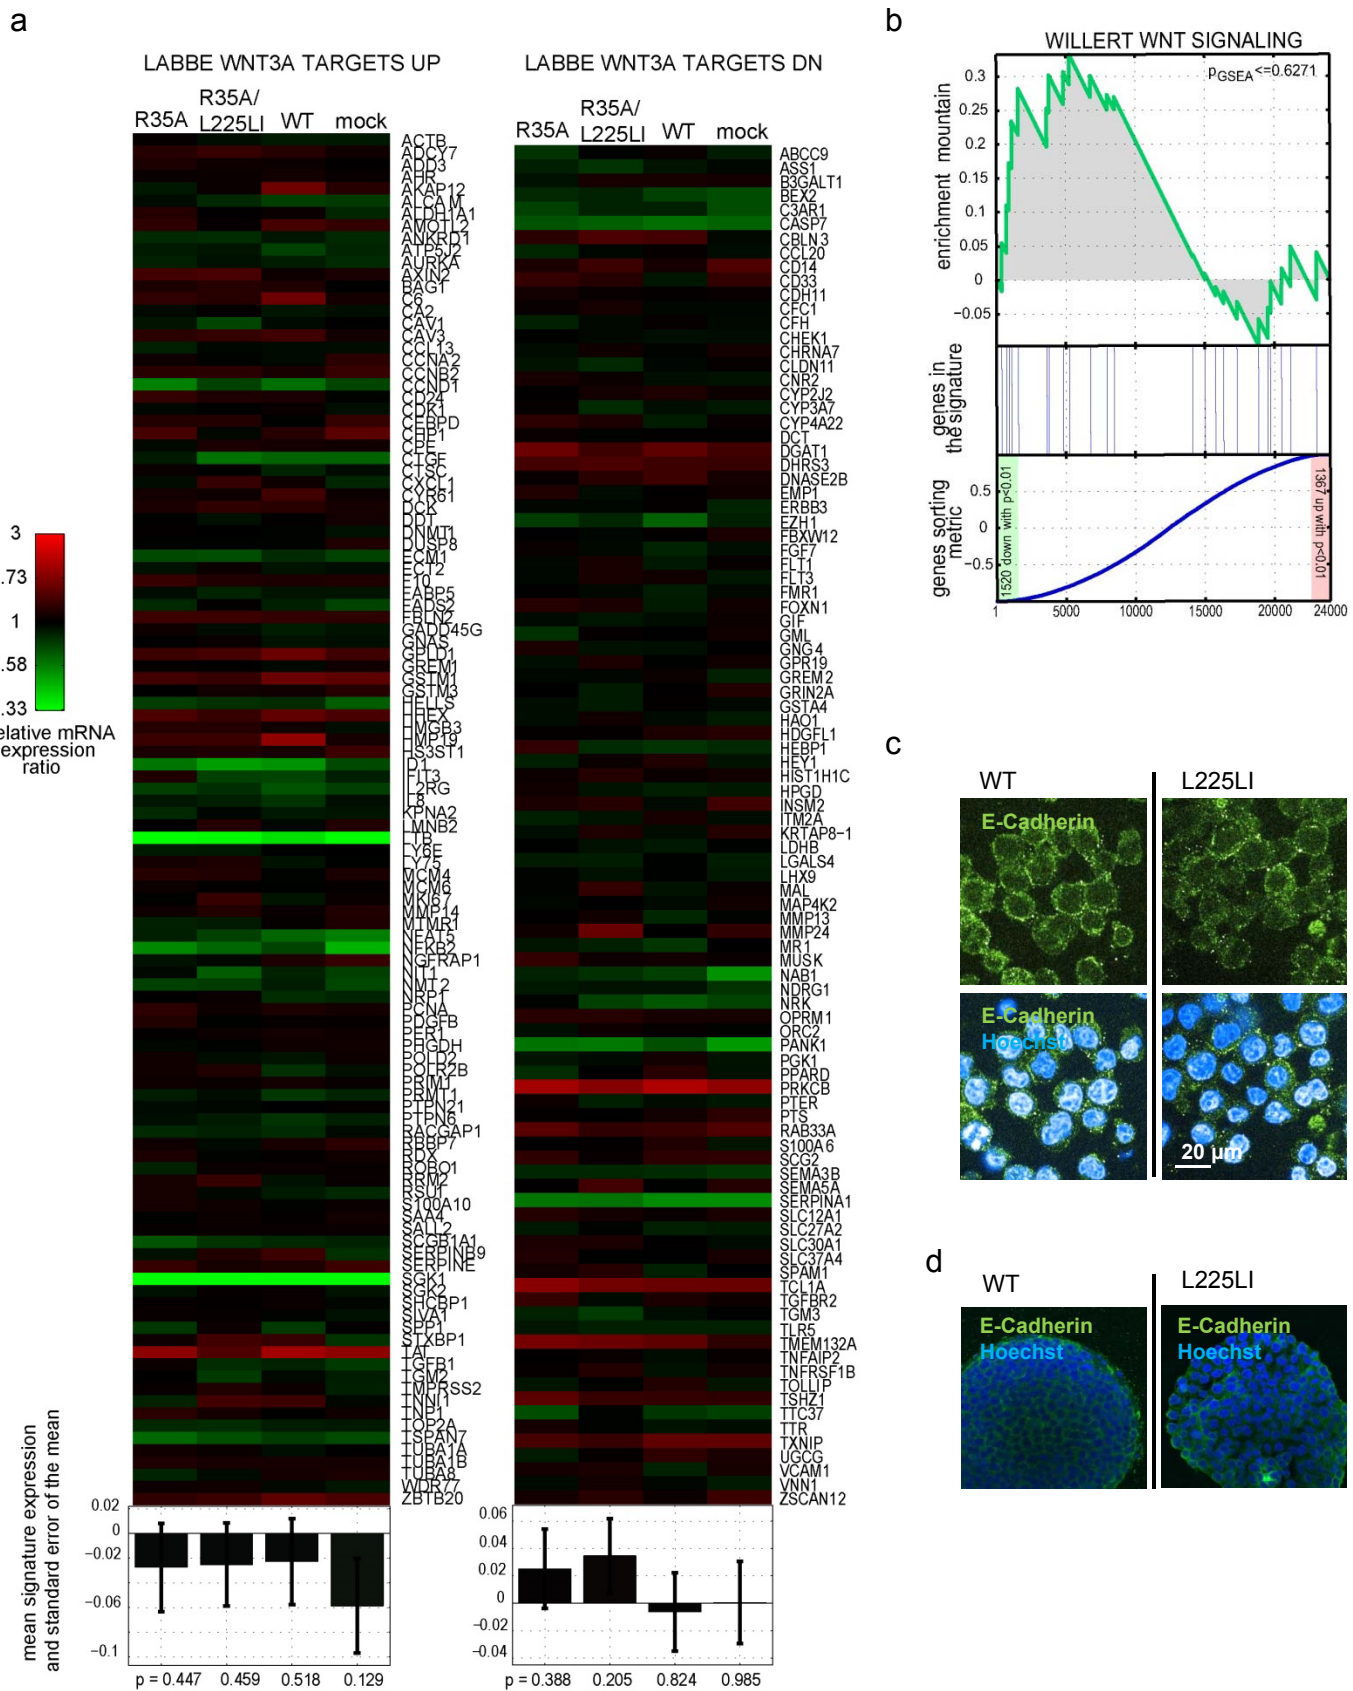

Fig. S7

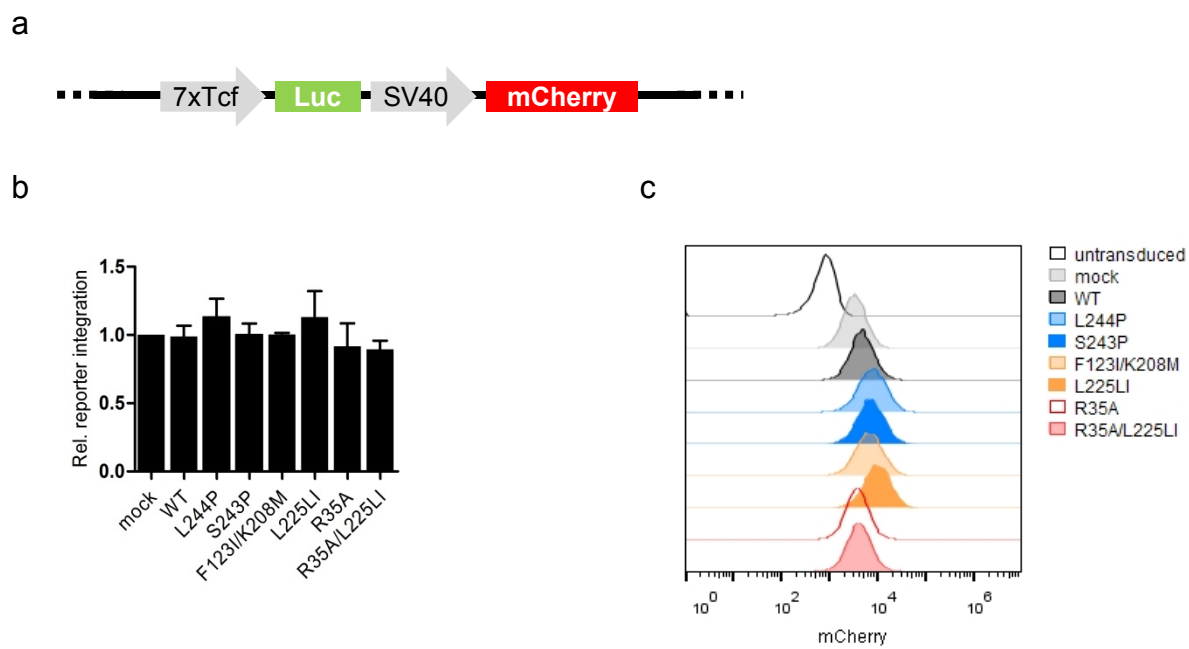

Fig. S8



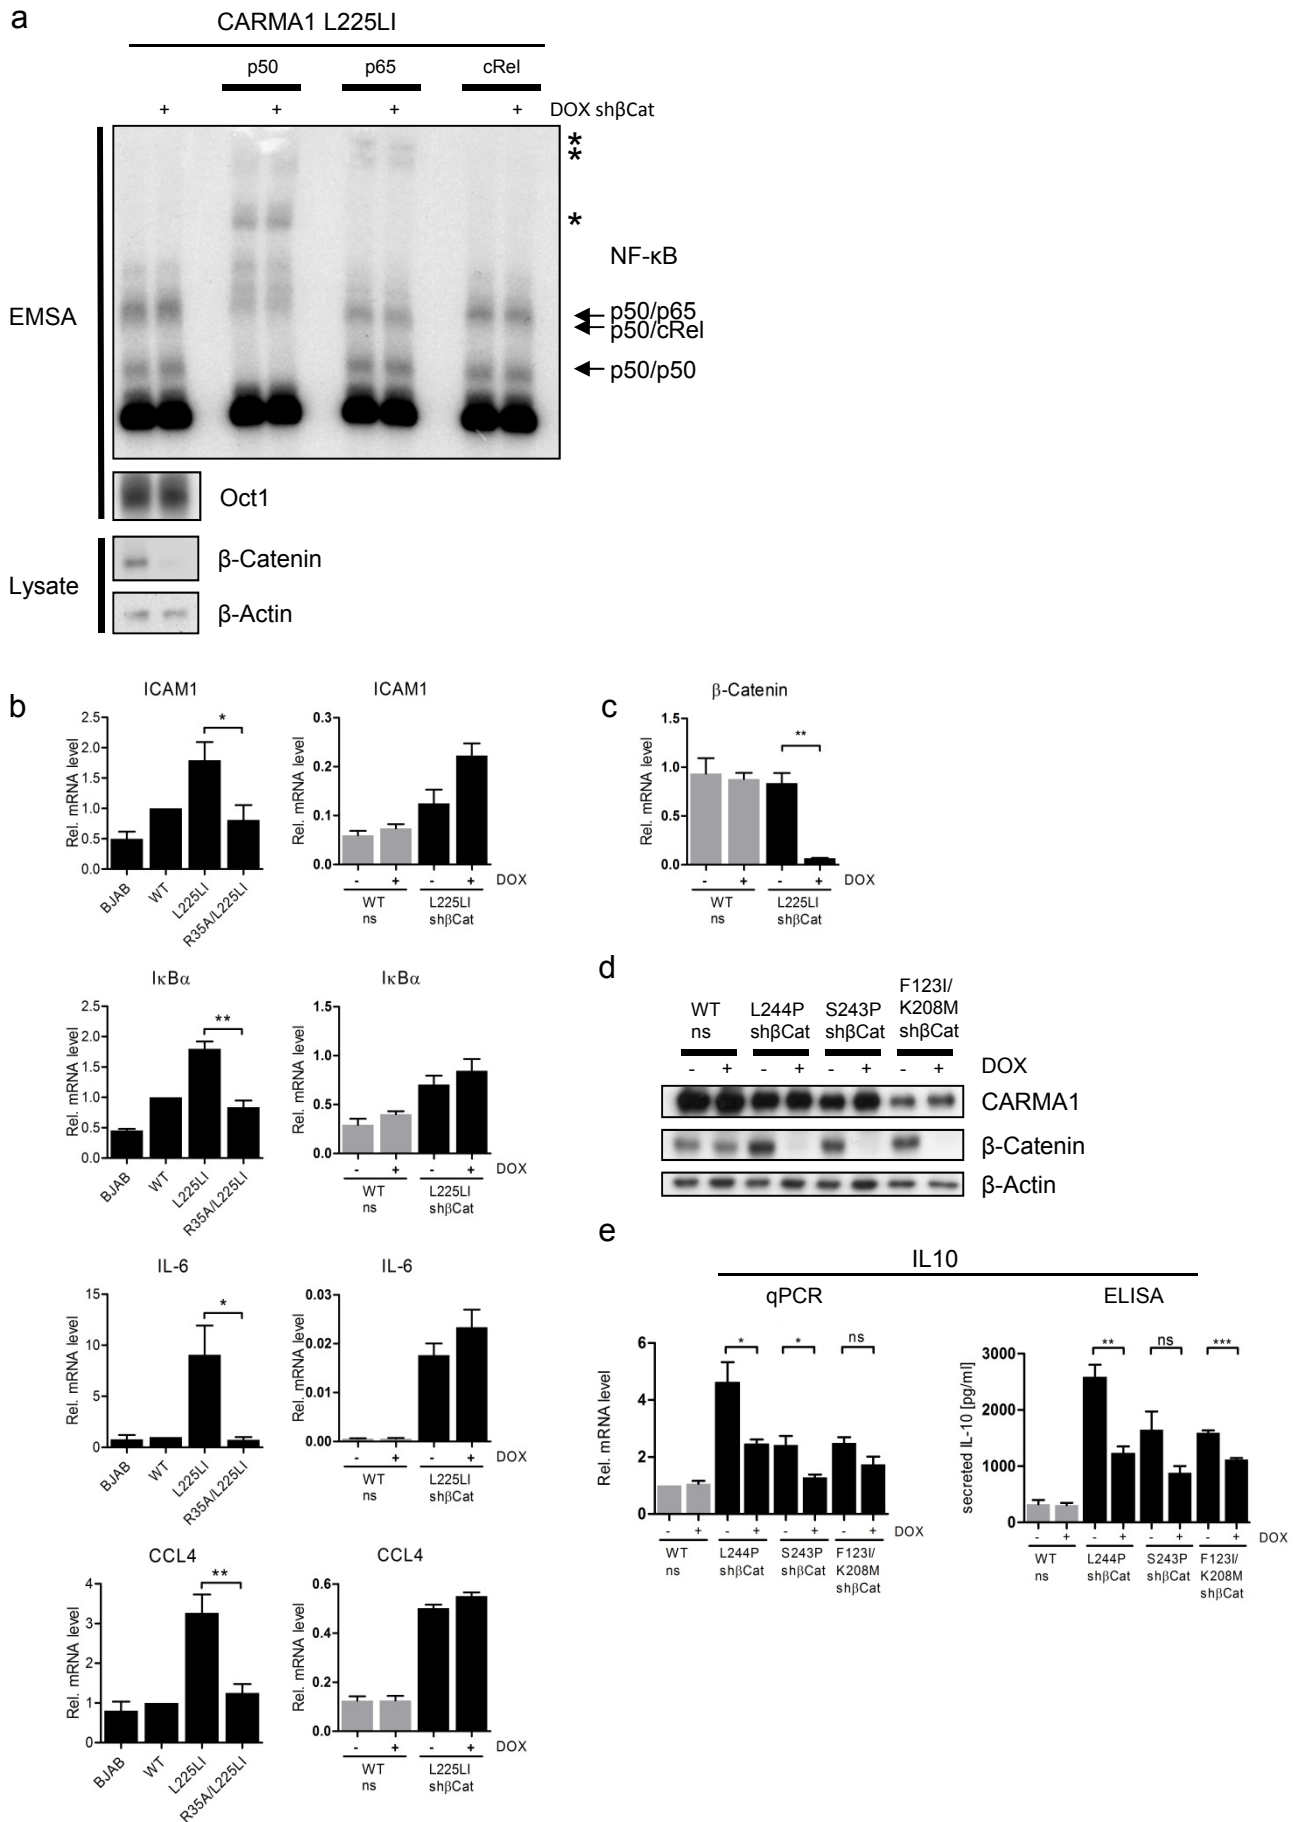

Fig. S9
